# Supplementary material
Source: PubMed Central journal article supplement (PMC2651261)
Supplement: 0805323106_0805323106SI.pdf [file 0805323106_0805323106SI.pdf]

# Supporting Information

Nozawa *et al.* 10.1073/pnas.0805323106

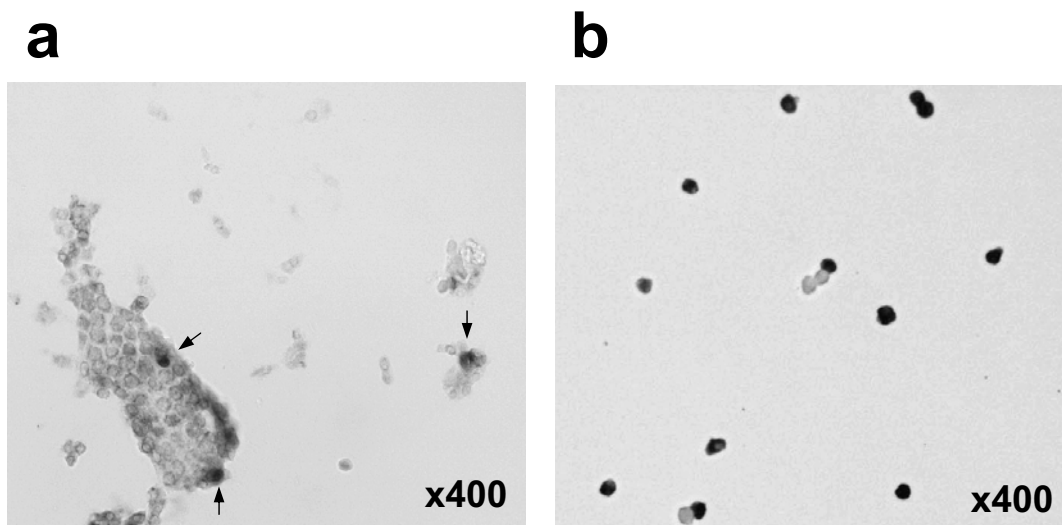

**Fig. S1.** Immunostaining for unfractionated epithelial cells (A) and enriched EC cells (B). 5-HT positive cells are sparsely distributed in unfractionated epithelial cells (arrows in A). Positive staining for 5-HT was obtained in over 80% of cells in the enriched EC cell fraction (B).

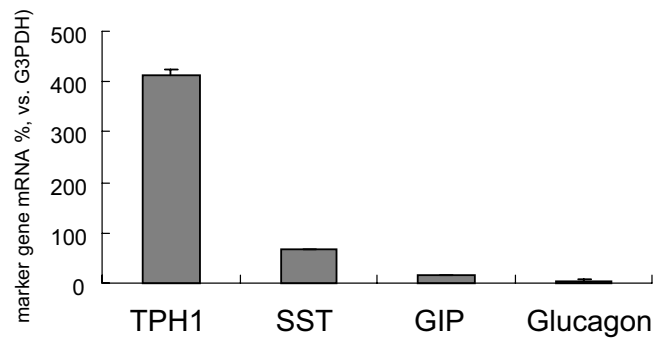

**Fig. S2.** RT-PCR identifiable contaminating cells in the enriched EC cell fraction. Data represent the ratio of somatostatin (SST), GIP, and glucagon to glyceraldehyde-3-phosphate dehydrogenase (G3PDH) mRNA. Data represent the mean  $\pm$  S.D. ( $n = 3$ ).

**Table S1. Primers used for real-time RT-PCR**

| Gene                           | Primer sequence (5'-3')    |                           |
|--------------------------------|----------------------------|---------------------------|
|                                | Forward                    | Reverse                   |
| Human TRPA1 (NM_007332)        | GAGAGTCCTTCTAGAACCATATCTGA | CATGAGGACAATTGGGACAAATATT |
| Rat TRPA1 (NM_207608)          | TCCTATACTGGAAGCAGCGA       | CTCCTGATTGCCATCGACT       |
| Mouse TRPA1 (NM_177781)        | TGCTGCAGAAAAAATCAAGTTGA    | CCTTGGCTGAGAAGAACTTTACACT |
| Rat TPH1 (NM_001100634)        | TTTTGTGACTGCGACATCAA       | CGTGGTGTGGGACTTCAGC       |
| Rat chromogranin A (NM_021655) | AGGAGCATGGGATTCCACAG       | TGGCTTTTCTGGCTTGCTG       |
| Rat synaptophysin (NM_012664)  | TTGGCAACTTATGGTTCGTGTT     | TGCTGGTTGCTTTTCCGG        |
| Rat VMAT1 (NM_013152)          | CCCTTCGGTGTAACCTGGAC       | TTTTGGTACTGAGCTGGCTTCA    |
| Rat somatostatin (NM_012659)   | CCAGACAGAGAACGATGCC        | CTCCAGCCTCATCTCGTCCT      |
| Rat GIP (NM_019630)            | CTTTGCCCAAGAGCCTCAGT       | CGCCATCCAGGCCAGTAG        |
| Rat glucagon (NM_012707)       | TCACAGGGCACATTCACCAG       | TCATCAACCACTGCACAAAATCT   |
